# Supplementary material for: Overview of Transcriptomic Research on Type 2 Diabetes: Challenges and Perspectives
Source: MDPI journal article supplement (doi:10.3390/genes13071176), 2022-06-30
Supplement: s1 [file s1]

Table S1 The main DEGs and biological processes identified by transcriptome studies

| Differentially expressed genes                                                                                                                  | Biological functions / enriched pathways                                                                                                                                                                                                                                                | References |
|-------------------------------------------------------------------------------------------------------------------------------------------------|-----------------------------------------------------------------------------------------------------------------------------------------------------------------------------------------------------------------------------------------------------------------------------------------|------------|
| <i>EGR2, PTGS2, IL1B</i>                                                                                                                        | Immune response                                                                                                                                                                                                                                                                         | [16]       |
| <i>ILF2, IL1RL1, IL4R, IL9R, LILRB2, LILRB4, MAPK11, GPX1, TNFRSF13B</i>                                                                        | T cell signaling and activation, nucleic acid metabolic process, signal transduction                                                                                                                                                                                                    | [17]       |
| <i>IRX5, THC2540257, THC2521898, WDR49, RNF150, HLA-DQA1, MED18, THC2667190, GNL3L, CENPI, OLFM4, ENST00000382691, CEACAM8, WIF1, H,LA-DQA2</i> | Innate and adaptive immunity, primary immunodeficiency signaling, interferon signaling, complement system, inositol metabolism, Wnt/ $\beta$ -catenin signaling, LXR/RXR activation, tight junction signaling, cleavage and polyadenylation of pre-mRNA                                 | [18]       |
| <i>UBE2A, UBE2B, UBE2E1, UBE2E3, UBE2G1, MARCH8, ANAPC10, ANAPC13, ANAPC5, FBXO11, COPS2, COPS3, PSMD11, PSMD12, USP1</i>                       | Glucose metabolism, ion channels, exocytosis, insulin and insulin signaling, apoptosis, oxidative stress, regeneration, cell cycle, ubiquitin–proteasome system                                                                                                                         | [20]       |
| <i>EGF, FAM46C, HBEGF, ID1, SH3BGRL2, TMEM158, VEPH1</i>                                                                                        | Immune response, lipid metabolism, transcription, apoptosis, oxidative stress, RAS pathway                                                                                                                                                                                              | [21]       |
| <i>CCND1, CCND3, CDK18, CDK5, CDKN1A</i>                                                                                                        | Cell cycle                                                                                                                                                                                                                                                                              | [22]       |
| <i>BRCA2, HLA-DQA1, MCM4, NOX1, PDCD6, PECAM1, PLD1, PPIC, RHOBTB2, SEC13, SOS1, VCAN, XPA</i>                                                  | Immune response, lipid metabolism, cell cycle, glucose metabolism, DNA repair, Rho signaling, platelet signaling, insulin receptor signaling                                                                                                                                            | [23]       |
| <i>ADCY9, TNNI3, RAPGEF3, CACNA1S, CACNG3, ADRA1B, CAMK2D, PPP2R3C, PPP2CA</i>                                                                  | Adrenergic signaling in cardiomyocytes                                                                                                                                                                                                                                                  | [24]       |
| <i>MFSD1, ARHGEF1</i>                                                                                                                           | Immune response, positive regulation of secretion, regulation of blood circle, actin-mediated cell contraction, carbon metabolism, propanoate metabolism, 2-oxocarboxylic acid metabolism, biosynthesis of amino acids, prostate cancer pathways                                        | [26]       |
| <i>HOXA5, ITLN1, RARRES3, RSPO3, HOXC10, CLDN1, RARRES1, KRT19, SLPI, CFI, IL18, MEIS1, TFPI2</i>                                               | HIF-1-, Toll-like receptor-, cGMP-PKG-, NF-kappa B-, p53-, AMPK-, Ras-, Hedgehog-, PI3K-Akt-, Wnt-, Hippo-, Rap1-, IL-17-, prolactin- signalling pathways                                                                                                                               | [27]       |
| <i>TGFB11I, VNN1, HLADRB4, CXCL8, FN1, BPTF, PDE3B;</i>                                                                                         | Granulocyte adhesion and diapedesis, pathogenesis of multiple sclerosis, macropinocytosis signaling, HER-2 signaling in breast cancer, B cell development, immune response                                                                                                              | [28]       |
| <i>MEF2C, CDC42SE2</i>                                                                                                                          | Muscular, vascular, neural, megakaryocyte, platelet development, B-cell signaling, immune response, regulation of actin cytoskeleton, phagocytosis                                                                                                                                      | [29]       |
| <i>HNRNPUL2, HLA-DRB1, CXCL9, NPAP1L, HNRNPUL1, HLA-DRB5, FAM96A, NEB, SCXA, SPATA6</i>                                                         | Immunological disease, cell morphology, immune response, cell cycle, PI3K/AKT signaling, NK-kB activation, PPAR signaling, cancer signaling,                                                                                                                                            | [30]       |
| <i>ACTN1, AKT3, ARF6, ARHGAP6, ARHGEF2, CDH15, CDH6, CTNN, DLC1, GNA11, GNAL, GNAZ, GNB5, GNG11, ITGA2B</i>                                     | Cancer signaling, cellular movement and development, hematological system development and function, gene expression, cell death and survival, immune response, cell-to-cell signaling and interactions, connective tissue disorders, cell morphology, cellular function and maintenance | [31]       |

|                                                                                                                             |                                                                                                                                                                                                                                |      |
|-----------------------------------------------------------------------------------------------------------------------------|--------------------------------------------------------------------------------------------------------------------------------------------------------------------------------------------------------------------------------|------|
| <i>FOXO3, BCL2, CYBB, IL6, G6PC2, PHKA1, PTPN1, RPS6KB1, SORBS1, CHEK1, CDK1, CDC14A, STAG1, TFDP1, TFDP2</i>               | Cell cycle, cancer signaling, cellular senescence, focal adhesion, HIF-1 signaling, oxidative phosphorylation, infectious disease, regulation of actin cytoskeleton, cytokine-cytokine receptor interaction, insulin signaling | [32] |
| <i>UBN1</i>                                                                                                                 | Endoplasmic reticulum protein localization, translational elongation, generation of precursor metabolites, protein polyubiquitination                                                                                          | [33] |
| <i>CL20, CXCL9, CXCL10, CXCL11, CXCL13, CCL18, JAK3, STAT1, STAT2, TNFSF10, TNFSF15, OAS1, OAS2, OAS3, IFIH1</i>            | Immune response, JAK/STAT signaling, TNF superfamily signaling, infectious disease, cell adhesion molecules pathway                                                                                                            | [35] |
| <i>UTY, FERP1, GCNT3, SAMD11, PKD2L2, CRLF1, SLC26A5, WDR38, C3orf65, MT-ND1, SLC12A1, MT-ND2, CACNA1H, MT-ND4L, EGFL8,</i> | Immune response, actin cytoskeleton, chromatin signaling                                                                                                                                                                       | [37] |
| <i>SLC12A1, THBD, TUBA1B, TUBA1A, PROK2, LILRA3, NFE2, AHNK, HLX, ZNF641, CXCR1, GPR27, GPR27, TNFSF10, TLR1</i>            | Myeloid leukocyte activation, T cell activation, adaptive immunity, cytokine production, cytokine-cytokine receptor interaction pathway, NF- $\kappa$ B signaling, cell adhesion molecules, chemokine signaling                | [38] |
| <i>MMP8, MMP7, CCL18, SPP1, RNF128, CXCL10, RPS4Y1, LBP, AGXT2L1, CH25H, IL1RN, ESM1, PHACTR3, LIPN, TULP2</i>              | Fatty acid synthesis, mitochondrial function, innate immunity, transcriptional regulation                                                                                                                                      | [39] |
| <i>AKT2, DCL6, LIPE, METTL9, CD59, LMNA, FOS, CCL2, MUSTN1, ZNF638</i>                                                      | Cholesterol metabolism, glycolysis, PPAR signaling pathway, maturity onset diabetes of the young, fatty acid degradation                                                                                                       | [40] |
| <i>SLC9A4, NECTIN2, PLPP3, LILRB5, AKR1C1</i>                                                                               | Immune response, lipid metabolism                                                                                                                                                                                              | [41] |
| <i>INS, FXR2, GPD2, LEPROTL1, RGS4, WFS1</i>                                                                                | Energy metabolism in mitochondria, protein synthesis, apoptosis, cytokine signaling                                                                                                                                            | [42] |
| <i>RASGRP1, GLP1R, GLRA1, LRFN2, ATP2A3, IL7R, SFRP4, CHL1, FAM105A, CLMP, KIAA1199, PFKFB2, ABCC8, FGF7, IL1R2</i>         | Islet cells growth, non-islet cells growth and proliferation                                                                                                                                                                   | [43] |
| <i>INS, STX1A, DLK1, GDA, CD36, RCOR1, LAPTM4B</i>                                                                          | Insulin signaling, immune response, nucleotide metabolism, intracellular signaling, chromatin regulation                                                                                                                       | [45] |

The table shows up to 15 significant DEGs from each study (sorted based on *p*-value) and enriched pathways (if given) or biological functions of the genes.
